# Supplementary material for: A triazine-based covalent organic framework/palladium hybrid for one-pot silicon-based cross-coupling of silanes and aryl iodides
Source: Royal Society of Chemistry journal article supplement (doi:10.1039/c5ra04433b), 2015-01-01
Supplement: c5ra04433b1.pdf [file c5ra04433b1.pdf]

## Electronic Supplementary Information

**A triazine-based covalent organic framework-palladium hybrid for  
one-pot silicon-based cross-coupling of silanes and aryl iodides**

Sha Lin,<sup>a</sup> Yuxia Hou,<sup>b</sup> Xiao Deng,<sup>a</sup> Haoliang Wang,<sup>a</sup> Shuzhuang Sun<sup>a</sup> and  
Xiaomei Zhang\*<sup>a</sup>

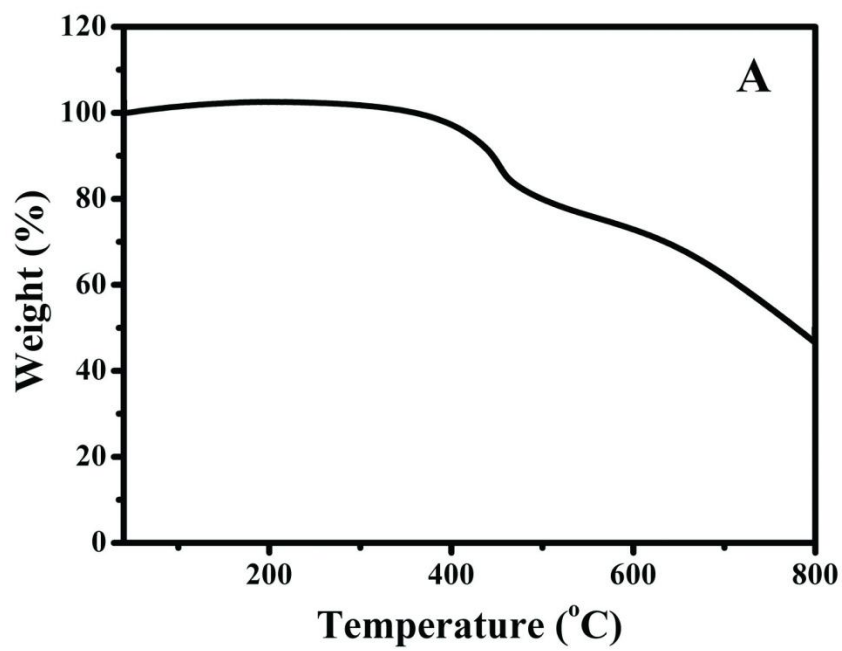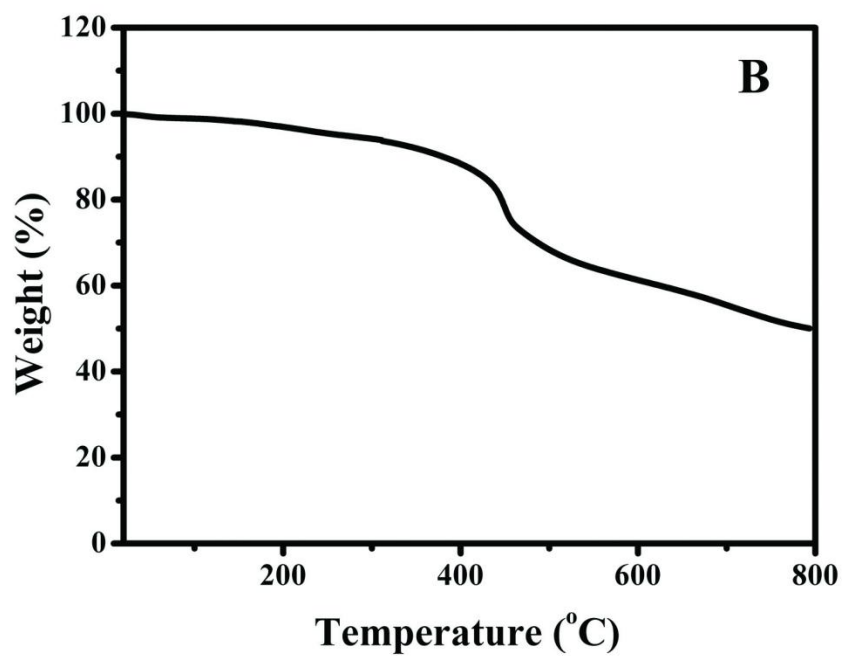

**Figure S1.** Thermogravimetric analysis (TGA) data of (A) **COF-SDU1** and (B) **Pd(II)/COF-SDU1**.

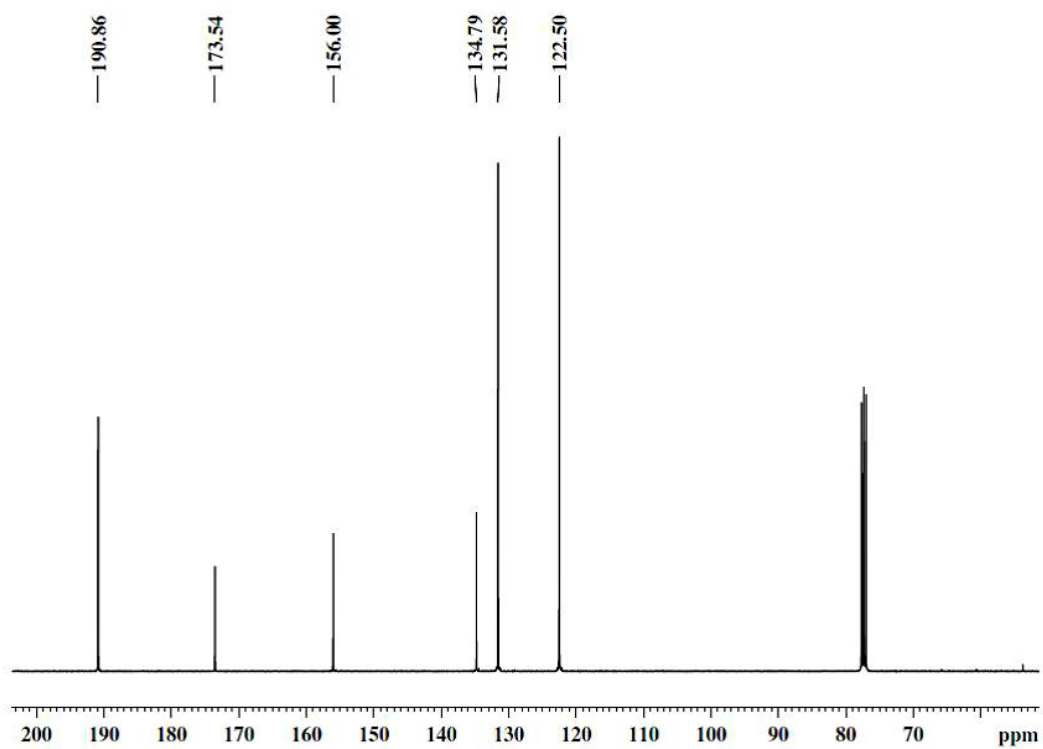

Figure S2.  $^{13}\text{C}$  CP/MAS NMR spectrum of trif.

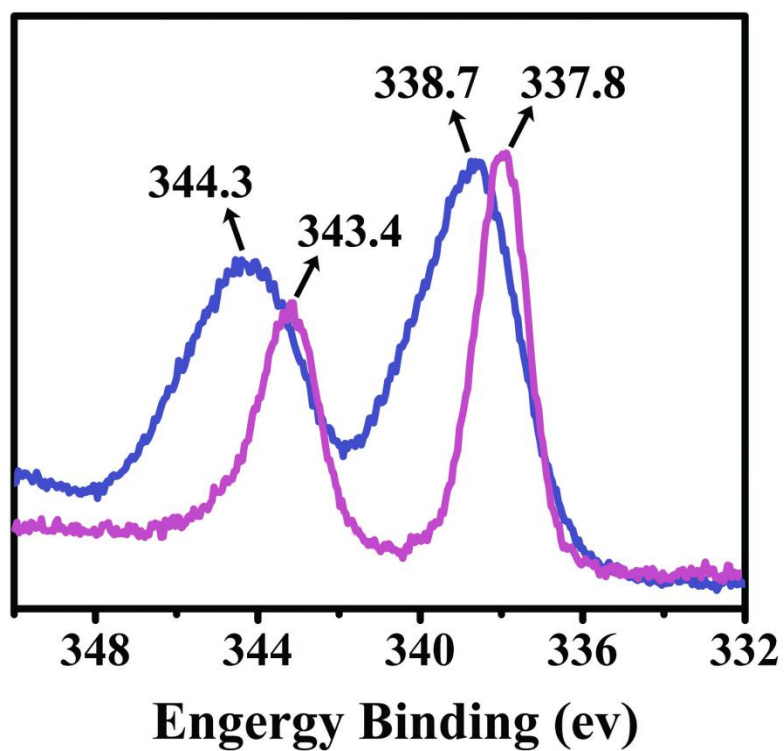

Figure S3. XPS spectrum of  $\text{Pd}(\text{OAc})_2$  (blue line) and  $\text{Pd}(\text{II})/\text{COF-SDU1}$  (pink line).

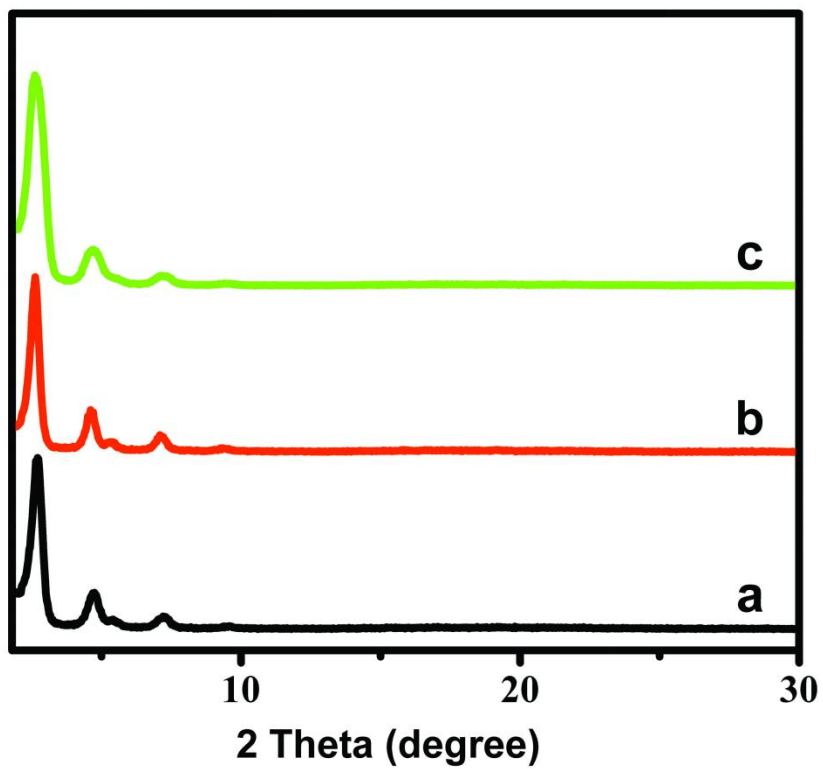

**Figure S4.** PXRD patterns of Pd(II)/COF-SDU1 (a) before reused, (b) after reused first time and (c) three times.

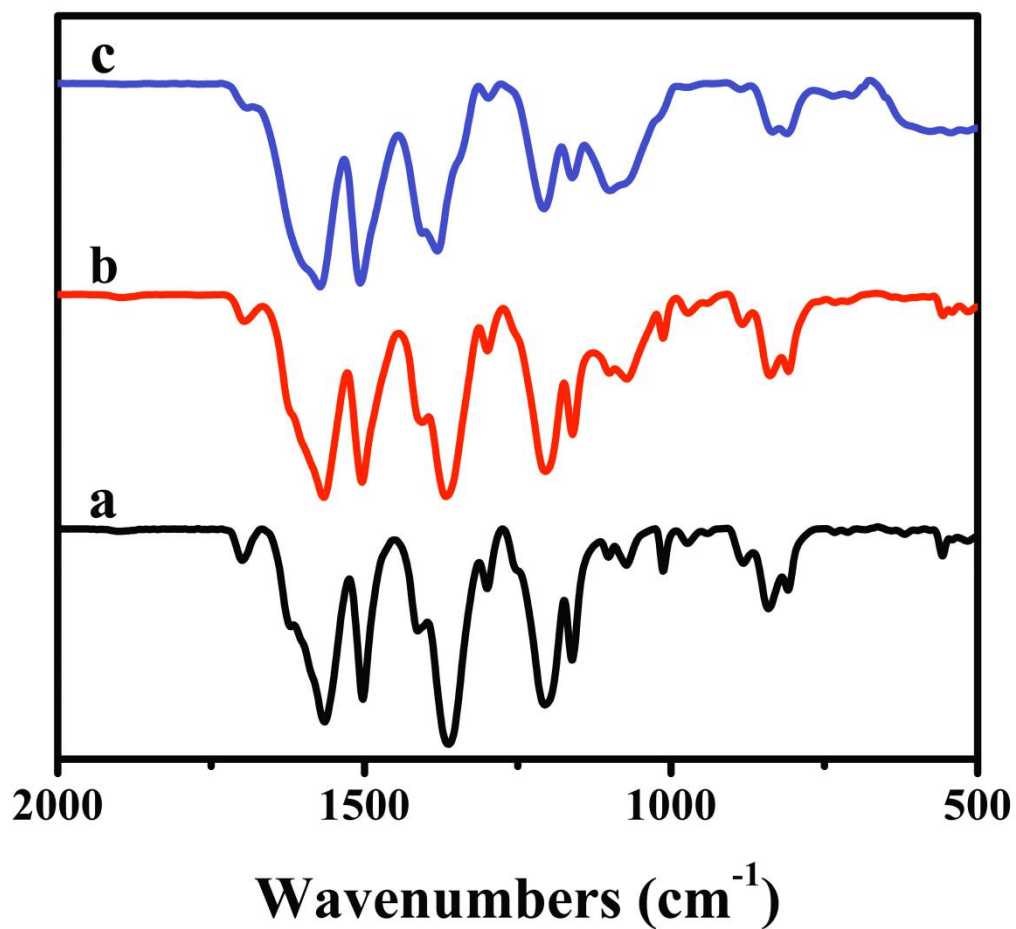

**Figure S5.** Fourier transforms infrared (FT-IR) spectra of **Pd(II)/COF-SDU1** (a) before reused, (b) after reused first time and (c) three times in the region of 500-2000  $\text{cm}^{-1}$  with 2  $\text{cm}^{-1}$  resolution.

**Table S1** Catalytic activity test of **Pd(II)/COF-SDU1** towards oxidation of organosilanes to organo(alkoxy)silanes or organosilanols.

$$\text{R}_{(4-n)}\text{SiH}_n + n \text{ROH} \xrightarrow{\text{Pd(II)/COF-SDU1}} \text{R}_{(4-n)}\text{Si(OR)}_n + n \text{H}_2$$

**1**

| Entry | R <sub>(4-n)</sub> SiH <sub>n</sub> | ROH                              | <b>1</b>  | t (h) <sup>a</sup> | Yield (%) <sup>b,c</sup> |
|-------|-------------------------------------|----------------------------------|-----------|--------------------|--------------------------|
| 1     | PhSiH <sub>3</sub>                  | H <sub>2</sub> O                 | <b>1a</b> | 2                  | 97.8                     |
| 2     | Me <sub>2</sub> PhSiH               | H <sub>2</sub> O                 | <b>1b</b> | 2                  | 97.3                     |
| 3     | Ph <sub>2</sub> SiH <sub>2</sub>    | H <sub>2</sub> O                 | <b>1c</b> | 2                  | 97.1                     |
| 4     | PhSiH <sub>3</sub>                  | CH <sub>3</sub> OH               | <b>1d</b> | 3                  | 98.0                     |
| 5     | PhSiH <sub>3</sub>                  | C <sub>2</sub> H <sub>5</sub> OH | <b>1e</b> | 3                  | 97.0                     |

<sup>a</sup> Reaction conditions: R<sub>(4-n)</sub>SiH<sub>n</sub> (1 mmol), ROH (5 mmol), **Pd(II)/COF-SDU1** (20 mg, 8.5 × 10<sup>-3</sup> mmol of Pd) and THF (2 mL), room temperature. <sup>b</sup> Isolated yield. <sup>c</sup> The values are the average of two independent experiments.

**Table S2** Catalytic activity test of **Pd(II)/COF-SDU1** towards silicon-based cross-coupling reaction of the organo(alkoxy)silanes or organosilanols with aryl iodides.

$$\text{C}_6\text{H}_5\text{-Si(R}^1\text{)(R}^2\text{)(R}^3\text{)} + \text{I-C}_6\text{H}_4\text{-} \xrightarrow{\text{Pd(II)/COF-SDU1}} \text{C}_6\text{H}_5\text{-C}_6\text{H}_4\text{-}$$

| Entry | R <sup>1</sup>   | R <sup>2</sup>   | R <sup>3</sup>   | t (h) <sup>a</sup> | Yield (%) <sup>b,c</sup> |
|-------|------------------|------------------|------------------|--------------------|--------------------------|
| 1     | OCH <sub>3</sub> | OCH <sub>3</sub> | OCH <sub>3</sub> | 7                  | 97.8                     |
| 2     | OCH <sub>3</sub> | CH <sub>3</sub>  | CH <sub>3</sub>  | 18                 | 58.1                     |
| 3     | OH               | CH <sub>3</sub>  | CH <sub>3</sub>  | 18                 | 66.5                     |

<sup>a</sup> Reaction conditions: organo(alkoxy)silanes or organosilanols (1 mmol), aryl halides (1.1 mmol), **Pd(II)/COF-SDU1** (20 mg, 8.5 × 10<sup>-3</sup> mmol of Pd), TBAF (3 mmol) and THF (2 mL), 80 °C. <sup>b</sup> Isolated yield. <sup>c</sup> The values are the average of two independent experiments.

**NMR signals:<sup>1-6</sup>**

**Phenylsilanetriol (1a):** <sup>1</sup>H NMR (300 MHz, CDCl<sub>3</sub>): δ=7.74-7.55 (m, 2H), 7.42-7.24 (m, 3H).

**Dimethylphenylsilanol (1b):** <sup>1</sup>H NMR (300 MHz, CDCl<sub>3</sub>): δ=7.64-7.60 (m, 2H), 7.46-7.37 (m, 3H), 3.15 (bs, 1H), 0.41 (s, 6H).

**Diphenylsilanediol (1c):** <sup>1</sup>H NMR (300 MHz, CDCl<sub>3</sub>): δ=7.73-7.70 (m, 4H), 7.49-7.33 (m, 6H), 2.17 (bs, 2H).

**Phenyltrimethoxysilane (1d):** <sup>1</sup>H NMR (400 MHz, CDCl<sub>3</sub>): δ=7.71-7.69 (m, 2H), 7.46-7.40 (m, 3H), 3.65 (s, 9H).

**Phenyltriethoxysilane (1e):** <sup>1</sup>H NMR (400 MHz, CDCl<sub>3</sub>): δ=7.70-7.66 (m, 2H), 7.40-7.30 (m, 3H), 3.90-3.83 (q, *J* = 6.9 Hz, 6H), 1.25-1.20 (t, *J* = 7.2 Hz, 9H).

**4-methyl-bipheny (2a):** <sup>1</sup>H NMR (300 MHz, CDCl<sub>3</sub>): δ=7.53-7.49 (m, 2H), 7.44-7.41 (m, 2H), 7.40-7.32 (m, 2H), 7.28-7.22 (m, 1H), 7.19-7.15 (m, 2H), 2.33-2.32 (d, *J* = 3.0 Hz, 3H). *R*<sub>f</sub> = 0.5 (100% petroleum ether).

**2-methyl-bipheny (2b):** <sup>1</sup>H NMR (300 MHz, CDCl<sub>3</sub>): δ=7.37-7.32 (m, 2H), 7.29-7.24 (m, 3H), 7.21-7.16 (m, 4H), 2.20 (s, 3H). *R*<sub>f</sub> = 0.5 (100% petroleum ether).

**4-methoxy-biphenyl (2c):** <sup>1</sup>H NMR (300 MHz, CDCl<sub>3</sub>): δ=7.57-7.51 (m, 4H), 7.44-7.39 (m, 2H), 7.33-7.28 (m, 1H), 7.01-6.56 (m, 2H), 3.86 (s, 3H). *R*<sub>f</sub> = 0.5 (100% petroleum ether).

**4-fluoro-bipheny (2d):** <sup>1</sup>H NMR (300 MHz, CDCl<sub>3</sub>): δ=7.51-7.41 (m, 4H), 7.40-7.25 (m, 3H), 7.09-7.02 (m, 2H). *R*<sub>f</sub> = 0.5 (100% petroleum ether).

**4-hydroxy-bipheny (2e):** <sup>1</sup>H NMR (300 MHz, CDCl<sub>3</sub>): δ=7.57-7.53 (m, 2H), 7.51-7.47 (m, 2H), 7.45-7.39 (m, 2H), 7.34-7.28 (m, 1H), 6.94-6.89 (m, 2H). *R*<sub>f</sub> = 0.5 (petroleum ether/*n*-hexane 1:1).

**4-nitro-biphenyl (2f):** <sup>1</sup>H NMR (300 MHz, CDCl<sub>3</sub>): δ=8.33-8.28 (m, 2H), 7.77-7.72 (m, 2H), 7.65-7.61 (m, 2H), 7.53-7.42 (m, 3H). *R*<sub>f</sub> = 0.5 (petroleum ether/ethyl acetate 1:1).

References:

1. J. John, E. Gravel, A. Hagége, H. Li, T. Gacoin, and E. Doris, *Angew. Chem. Int. Ed.* 2011, **50**, 7533-7536.
2. M. Shibata, R. Horie and W. Yoneta, *Polymer*, 2010, **51**, 5764-5770.
3. A. S. Manoso, C. Ahn, A. Soheili, C. J. Handy, R. Correia, W. M. Seganish, and P. DeShong, *J. Org. Chem.*, 2004, **69**, 8305-8314.
4. L. Bai and J. Wang, *Adv. Synth. Catal.* 2008, **350**, 315-320.
5. D. A. Watson, M. Su, G. Teverovskiy, Y. Zhang, J. G. Fortanet, T. Kinzel and S. L. Buchwald, *Science*, 2009, **325**, 1661-1664.
6. P. D. Stevens, J. Fan, H. M. R. Gardimalla, M. Yen and Y. Gao, *Org. Lett.*, 2005, **7**, 2085-2088.
